# Supplementary material for: Size-based sorting of dynamic bacterial clusters
Source: Royal Society of Chemistry journal article supplement (doi:10.1039/d5lc01111f), 2026-01-01
Supplement: d5lc01111f1.zip [file data_overview_size_based_sorting_1oct2025.xlsx]

## Sheet: Overview
Main text Figure	SI Figure	SI Table	Purpose	Sample	Raw data - data set name	Processed data - data set name	Raw data	Analysed data
Fig.4, 5	Fig. S7, 8	Table S1	experiment: bacteria sorting by DLD	Bacteria (date of culture 28-JUNE-2024)	Microscopic images used for size-based analysis	Excel_file_inluding_measured_values	https://dataverse.harvard.edu/dataset.xhtml?persistentId=doi:10.7910/DVN/SZ8L0I	https://dataverse.harvard.edu/dataset.xhtml?persistentId=doi:10.7910/DVN/1BNFJ5
Fig.2	Fig. S8,9,11,13,16	Table S3, 4	experiment: DLD device characterization by polystyrene beads	Beads, 10um CV 13%	Beads data	Excel_file_inluding_measured_values	https://dataverse.harvard.edu/dataset.xhtml?persistentId=doi:10.7910/DVN/EWMBUO	https://dataverse.harvard.edu/dataset.xhtml?persistentId=doi:10.7910/DVN/1BNFJ5
Fig.2	Fig. S9,10,13	Table S1, 3	experiment: DLD device characterization by polystyrene beads	Beads, 7um CV 18%	Beads data	Excel_file_inluding_measured_values	https://dataverse.harvard.edu/dataset.xhtml?persistentId=doi:10.7910/DVN/EWMBUO	https://dataverse.harvard.edu/dataset.xhtml?persistentId=doi:10.7910/DVN/1BNFJ5
Fig.2	Fig. S9,12,13	Table S2	experiment: DLD device characterization by polystyrene beads	Beads, 16um CV 12%	Beads data	Excel_file_inluding_measured_values	https://dataverse.harvard.edu/dataset.xhtml?persistentId=doi:10.7910/DVN/EWMBUO	https://dataverse.harvard.edu/dataset.xhtml?persistentId=doi:10.7910/DVN/1BNFJ5
Fig.2	Fig. S8,9,11,13,16	Table S3, 4	experiment: DLD device characterization by polystyrene beads	Beads, 10um CV 13%	Videos of fluorescent-labelled bacteria and beads inside the DLD device	Excel_file_inluding_measured_values	https://dataverse.harvard.edu/dataset.xhtml?persistentId=doi:10.7910/DVN/PV6OZY	https://dataverse.harvard.edu/dataset.xhtml?persistentId=doi:10.7910/DVN/1BNFJ5
Fig.2	Fig. S9,10,13	Table S1, 3	experiment: DLD device characterization by polystyrene beads	Beads, 7um CV 18%	Beads data	Excel_file_inluding_measured_values	https://dataverse.harvard.edu/dataset.xhtml?persistentId=doi:10.7910/DVN/PV6OZY	https://dataverse.harvard.edu/dataset.xhtml?persistentId=doi:10.7910/DVN/1BNFJ5
Fig.2	Fig. S9,12,13	Table S2	experiment: DLD device characterization by polystyrene beads	Beads, 16um CV 12%	Beads data	Excel_file_inluding_measured_values	https://dataverse.harvard.edu/dataset.xhtml?persistentId=doi:10.7910/DVN/PV6OZY	https://dataverse.harvard.edu/dataset.xhtml?persistentId=doi:10.7910/DVN/1BNFJ5
	Fig. S4		experiment: Checking DLD device fabrication result	Microscope images device	Excel_file_inluding_measured_values	Excel_file_inluding_measured_values	https://dataverse.harvard.edu/dataset.xhtml?persistentId=doi:10.7910/DVN/1BNFJ5	https://dataverse.harvard.edu/dataset.xhtml?persistentId=doi:10.7910/DVN/1BNFJ5
	Fig. S2		simulation: Optimize flow in the DLD channel inlets	COMSOL simulation on channel inlets, outlets, and observation area	Excel_file_inluding_measured_values	Excel_file_inluding_measured_values	https://dataverse.harvard.edu/dataset.xhtml?persistentId=doi:10.7910/DVN/1BNFJ5	https://dataverse.harvard.edu/dataset.xhtml?persistentId=doi:10.7910/DVN/1BNFJ5
	Fig. S5	Table S2	experiment: Measure DLD device resistance	MiliQ water to measure channel resistance	Excel_file_inluding_measured_values	Excel_file_inluding_measured_values	https://dataverse.harvard.edu/dataset.xhtml?persistentId=doi:10.7910/DVN/1BNFJ5	https://dataverse.harvard.edu/dataset.xhtml?persistentId=doi:10.7910/DVN/1BNFJ5
Fig.6			experiment: Checking GAS clusters dynamics in DLD device	Bacteria (date of culture 10-OCT-2024)	Replication Data for: Group A streptococcus dynamics in DLD	Replication Data for: Group A streptococcus dynamics in DLD	https://dataverse.harvard.edu/dataset.xhtml?persistentId=doi:10.7910/DVN/Q9M9QL	https://dataverse.harvard.edu/dataset.xhtml?persistentId=doi:10.7910/DVN/Q9M9QL
	Fig. S16	Table S6	experiment: Checking GAS clusters stability in batch	Bacteria (date of culture 04-OCT-2024)	Replication Data for: Cluster dynamics in batch	Excel_file_inluding_measured_values	https://dataverse.harvard.edu/dataset.xhtml?persistentId=doi:10.7910/DVN/YSLHGB	https://dataverse.harvard.edu/dataset.xhtml?persistentId=doi:10.7910/DVN/1BNFJ5
	Fig. S17		experiment: observing GAS clusters motion (deformability, rotation) in DLD device by fast imaging	Bacteria	Replication Data for: Tracking the motion of group A streptococcus using fast imaging	Replication Data for: Tracking the motion of group A streptococcus using fast imaging	https://dataverse.harvard.edu/dataset.xhtml?persistentId=doi:10.7910/DVN/FVYMKG	https://dataverse.harvard.edu/dataset.xhtml?persistentId=doi:10.7910/DVN/FVYMKG
Fig. 3	Fig. S14	Table S5	experiment: Collecting data for Dc calculation using Bayes theory	Beads, 10um CV 13%, 16um CV 12%	Beads data	Excel_file_inluding_measured_values	https://dataverse.harvard.edu/dataset.xhtml?persistentId=doi:10.7910/DVN/EWMBUO	https://dataverse.harvard.edu/dataset.xhtml?persistentId=doi:10.7910/DVN/1BNFJ5
Fig.7			experiment: Sorted GAS phagocytosis	Bacteria (date of culture 28-JUNE-2024)	Replication Data for: time-lapse phagocytosis of group A streptococcus sorted by deterministic lateral displacement	Excel_file_inluding_measured_values	https://dataverse.harvard.edu/dataset.xhtml?persistentId=doi:10.7910/DVN/Q7CB1Y	https://dataverse.harvard.edu/dataset.xhtml?persistentId=doi:10.7910/DVN/1BNFJ5

## Sheet: Detailed descriptions
Date	Sample	Time(min)	Volume per outlets (ml)	Volume (ml)	Device	number of Outlets	Flowrate (ml/min, each outlet)	Smaple concentration	Pressure(mbar)	Raw data	analysis software	Analysed data	Figure number							Comment
2024-07-01	Bacteria (date of cluture 28/06/2024)	30	0.3	0.9	Dc=8.5, N=69, Gap=45um	3	0.03	100ul of bacteria from culture batch in 4ml of BSA	Buffer =150, Sample=120	https://dataverse.harvard.edu/dataset.xhtml?persistentId=doi:10.7910/DVN/SZ8L0I	Python 3.8, FiJI, Affinity for polishing figures	https://dataverse.harvard.edu/dataset.xhtml?persistentId=doi:10.7910/DVN/1BNFJ5	Fig.7,8 in ESI, Fig.4 and Fig.5 in main Text, table S1 in ESI							purpose of experiment: bacteria sorting by DLD
Date	Sample	Time(min)	Volume per outlets (ml)	Volume (ml)	Device	number of Outlets	Flowrate (ml/min, each outlet)	Smaple concentration	Pressure(mbar)	Raw data	analysis software	Analysed data	Figure number							Comment
14/06/2024, 19/09/2025	Beads, 10um CV 13%				Dc=8.5, N=69, Gap=45um	3		30beads/ul	Buffer =150, Sample 120	https://dataverse.harvard.edu/dataset.xhtml?persistentId=doi:10.7910/DVN/EWMBUO, https://dataverse.harvard.edu/dataset.xhtml?persistentId=doi:10.7910/DVN/PV6OZY	Python 3.8, FiJI, Affinity for polishing figures	https://dataverse.harvard.edu/dataset.xhtml?persistentId=doi:10.7910/DVN/1BNFJ5	Fig.8,9,11,13,16 in ESI, Fig.2 in main text, table S 3,4 in ESI							Purpose of experiment: DLD device characterization by polystyrene beads
2024-06-14	Beads, 7um CV18%				Dc=8.5, N=69, Gap=45um	3		58beads/ul	Buffer =150, Sample 120	https://dataverse.harvard.edu/dataset.xhtml?persistentId=doi:10.7910/DVN/EWMBUO, https://dataverse.harvard.edu/dataset.xhtml?persistentId=doi:10.7910/DVN/PV6OZY	Python 3.8, FiJI, Affinity for polishing figures	https://dataverse.harvard.edu/dataset.xhtml?persistentId=doi:10.7910/DVN/1BNFJ5	Fig.9,10,13 in ESI, Fig.2 in main text, table 1,3 in ESI							Purpose of experiment: DLD device characterization by polystyrene beads
17/06/2024, 19/09/2025	Beads, 16um CV12%							27beads/ul	Buffer =150, Sample 120	https://dataverse.harvard.edu/dataset.xhtml?persistentId=doi:10.7910/DVN/EWMBUO, https://dataverse.harvard.edu/dataset.xhtml?persistentId=doi:10.7910/DVN/PV6OZY	Python 3.8, FiJI, Affinity for polishing figures	https://dataverse.harvard.edu/dataset.xhtml?persistentId=doi:10.7910/DVN/1BNFJ5	Fig.9,12,13 in ESI, Fig.2 in main text, table 2 in ESI							Purpose of experiment: DLD device characterization by polystyrene beads
Date	Sample	Time(min)	Volume per outlets (ml)	Volume (ml)	Device	number of Outlets	Flowrate (ml/min, each outlet)	Smaple concentration	Pressure(mbar)	Raw data	analysis software	Analysed data	Figure number							Comment
2024-07-01	Taking images from device				Dc=8.5, N=69, Gap=45um					https://dataverse.harvard.edu/dataset.xhtml?persistentId=doi:10.7910/DVN/1BNFJ5	Python 3.8, FiJI, Affinity for polishing figures	https://dataverse.harvard.edu/dataset.xhtml?persistentId=doi:10.7910/DVN/1BNFJ5	Fig.4 in ESI							Purpose of experiment: Checking DLD device fabrication result
Date	Sample	Time(min)	Volume per outlets (ml)	Volume (ml)	Device	number of Outlets	Flowrate (ml/min, each outlet)	Smaple concentration	Pressure(mbar)	Raw data	analysis software	Analysed data	Figure number							Comment
2023-12-21	COMSOL simulation on channel inlets, outlets, and observation area				Dc=8.5, N=69, Gap=45um					https://dataverse.harvard.edu/dataset.xhtml?persistentId=doi:10.7910/DVN/1BNFJ5	COMSOL, Affinity for polishing figures	https://dataverse.harvard.edu/dataset.xhtml?persistentId=doi:10.7910/DVN/1BNFJ5	Fig.2 in ESI							Purpose: Optimize flow in the DLD channel inlets
Date	Sample	Time(min)	Volume per outlets (ml)	Volume (ml)	Device	number of Outlets	Flowrate (ml/min, each outlet)	Smaple concentration	Pressure(mbar)	Raw data	analysis software	Analysed data	Figure number							Comment
24/04/2024 and 25/06/2024	MiliQ water to measure channel resistance	Data can be found in excel files and final plots			Dc=8.5, N=69, Gap=45um	3			can be found in excel files	https://dataverse.harvard.edu/dataset.xhtml?persistentId=doi:10.7910/DVN/1BNFJ5	Python, Excel, Affinity for polishing figures	https://dataverse.harvard.edu/dataset.xhtml?persistentId=doi:10.7910/DVN/1BNFJ5	Fig.5 in ESI, table S2 in ESI							Purpose of experiment: Measure DLD device resistance
Date	Sample	Time(min)	Volume per outlets (ml)	Volume (ml)	Device	number of Outlets	Flowrate (ml/min, each outlet)	Smaple concentration	Pressure(mbar)	Raw data	analysis software	Analysed data	Figure number							Comment
2024-10-11	Bacteria (date of cluture10/10/2024)	30	0.3	0.9	Dc=8.5, N=69, Gap=45um	3	0.03	100ul of bacteria from culture batch in 4ml of BSA	Buffer =150, Sample=120	https://dataverse.harvard.edu/dataset.xhtml?persistentId=doi:10.7910/DVN/Q9M9QL	Python 3.8, FiJI, Affinity for polishing figures	https://dataverse.harvard.edu/dataset.xhtml?persistentId=doi:10.7910/DVN/Q9M9QL	Fig.6 in main Text							Purpose of experiment: Checking GAS clusters dynamics in DLD device
Date	Sample	Time(min)	Volume per outlets (ml)	Volume (ml)	Device	number of Outlets	Flowrate (ml/min, each outlet)	Smaple concentration	Pressure(mbar)	Raw data	analysis software	Analysed data	Figure number							Comment
2024-10-05	Bacteria (date of cluture04/10/2024)	-	-	-	-	-	-	100ul of bacteria from culture batch in 4ml of BSA	-	https://dataverse.harvard.edu/dataset.xhtml?persistentId=doi:10.7910/DVN/YSLHGB	Python 3.8, FiJI, Affinity for polishing figures	https://dataverse.harvard.edu/dataset.xhtml?persistentId=doi:10.7910/DVN/1BNFJ5	Fig.16 in ESI, table 6 in ESI							Purpose of experiment: Checking GAS clusters stability in batch
Date	Sample	Time(min)	Volume per outlets (ml)	Volume (ml)	Device	number of Outlets	Flowrate (ml/min, each outlet)	Smaple concentration	Pressure(mbar)	Raw data	analysis software	Analysed data	Figure number							Comment
2024-01-09	Bacteria	3h	1.8	5.4	Dc=8.5, N=69, Gap=45um	3	0.3	100ul of bacteria from culture batch in 4ml of BSA	Buffer =150, Sample=120	https://dataverse.harvard.edu/dataset.xhtml?persistentId=doi:10.7910/DVN/FVYMKG	Python 3.8, FiJI, Affinity for polishing figures	https://dataverse.harvard.edu/dataset.xhtml?persistentId=doi:10.7910/DVN/FVYMKG	Fig.S17 in ESI							Purpose of experiment: observing GAS clusters motion (deformability, rotation) in DLD device by fast imaging
Date	Sample	Time(min)	Volume per outlets (ml)	Volume (ml)	Device	number of Outlets	Flowrate (ml/min, each outlet)	Smaple concentration	Pressure(mbar)	Raw data	analysis software	Analysed data	Figure number							Comment
14/06/2024, 19/09/2025	Beads, 10um CV 13%, 16um CV 12%				Dc=8.5, N=69, Gap=45um	3			Buffer =150, Sample 120	https://dataverse.harvard.edu/dataset.xhtml?persistentId=doi:10.7910/DVN/EWMBUO	Python 3.8, FiJI, Ilastik	https://dataverse.harvard.edu/dataset.xhtml?persistentId=doi:10.7910/DVN/1BNFJ5	Table S 5 in ESI, Fig S14 in ESI							Purpose of experiment: Collecting data for Dc calculation using Bayes theory
Date	Sample	Time(min)	Volume per outlets (ml)	Volume (ml)	Device	number of Outlets	Flowrate (ml/min, each outlet)	Smaple concentration	Pressure(mbar)	Raw data	analysis software	Analysed data	Figure number							Comment
2024-07-03	Bacteria (date of cluture 28/06/2024)	180	0.3	0.9	Ibidi glass slides coated with fibronectin					https://dataverse.harvard.edu/dataset.xhtml?persistentId=doi:10.7910/DVN/Q7CB1Y	Python 3.8	https://dataverse.harvard.edu/dataset.xhtml?persistentId=doi%3A10.7910%2FDVN%2F1BNFJ5&showIngestSuccess=true&version=DRAFT	Fig.7 in main Text							Purpose of experiment: Sorted GAS phagocytosis
